# Supplementary material
Source: PubMed Central journal article supplement (PMC2995828)
Supplement: NIHMS250721-supplement-1_si_001.pdf [file NIHMS250721-supplement-1_si_001.pdf]

**SUPPORTING INFORMATION**

**Enhanced Detection and Identification of Glycopeptides in Negative Ion Mode Mass Spectrometry**

Charles C. Nwosu,<sup>1</sup> John S. Strum,<sup>1</sup> Hyun Joo An<sup>1</sup> and Carlito B. Lebrilla<sup>\*,1,2</sup>

1. Department of Chemistry, University of California, Davis, CA 95616, USA.
2. Department of Biochemistry and Molecular Medicine, University of California, Davis, CA 95616, USA.

---

\* To whom correspondence should be addressed:

Carlito B. Lebrilla, Email address: [cblebrilla@ucdavis.edu](mailto:cblebrilla@ucdavis.edu); Tel: +1-530-752-0504; Fax: +1-530-752-8995

## Table Caption

**Table S-1:** Combined list of potential bovine lactoferrin (b-LF) glycopeptides after 24 hrs immobilized-pronase digestion and MS analysis in the negative ion mode MALDI FT-ICR MS. Assignments were made strictly based on mass.

**Table S-2:** Combined list of potential bovine lactoferrin (b-LF) glycopeptides after 24 hrs immobilized-pronase digestion and MS analysis in the positive ion mode MALDI FT-ICR MS.

**Table S-3:** Combined list of potential kappa casein (k-CN) glycopeptides after 24 hrs immobilized-pronase digestion and MS analysis in the negative ion mode MALDI FT-ICR MS.

**Table S-4:** Combined list of potential kappa casein (k-CN) glycopeptides after 24 hrs immobilized-pronase digestion and MS analysis in the positive ion mode MALDI FT-ICR MS.

Table S-1

| GP Mass (Da) | Relative Intensity | Error (ppm) | Charge State           | Glycans |        |        |       | H <sub>2</sub> O loss | Glycosite | Peptide Mass (Da) | Peptide Sequence |
|--------------|--------------------|-------------|------------------------|---------|--------|--------|-------|-----------------------|-----------|-------------------|------------------|
|              |                    |             |                        | Hex     | HexNAc | Fucose | NeuAc |                       |           |                   |                  |
| 2034.7030    | 100.0              | 0.3         | [M-H] <sup>-</sup>     | 8       | 2      | 0      | 0     | 0                     | 252       | 315.1179          | NNS              |
| 2196.7546    | 81.9               | 0.3         | [M-H] <sup>-</sup>     | 9       | 2      | 0      | 0     | 0                     | 252       | 315.1179          | NNS              |
| 1922.7114    | 76.4               | 2.6         | [M-H] <sup>-</sup>     | 5       | 2      | 0      | 0     | 0                     | 387       | 689.2803          | SGQNVTC          |
| 1922.7114    | 76.4               | 2.6         | [M-H] <sup>-</sup>     | 5       | 2      | 0      | 0     | 0                     | 495       | 689.2803          | VNQTGSC          |
| 1922.7114    | 76.4               | 0.2         | [M-2H+Na] <sup>-</sup> | 3       | 3      | 1      | 0     | 0                     | 387       | 642.2722          | QQSGQN           |
| 1922.7114    | 76.4               | 0.8         | [M-H] <sup>-</sup>     | 4       | 4      | 1      | 0     | 0                     | 387       | 299.1230          | GQN              |
| 1922.7114    | 76.4               | 0.8         | [M-H] <sup>-</sup>     | 3       | 4      | 2      | 0     | 0                     | 252       | 315.1179          | NNS              |
| 1922.7114    | 76.4               | 0.8         | [M-H] <sup>-</sup>     | 4       | 5      | 0      | 0     | 0                     | 387       | 242.1015          | QN               |
| 1922.7114    | 76.4               | 0.8         | [M-H] <sup>-</sup>     | 4       | 5      | 0      | 0     | 0                     | 495       | 242.1015          | NQ               |
| 2018.7058    | 70.9               | 0.9         | [M-H] <sup>-</sup>     | 8       | 2      | 0      | 0     | 0                     | 387       | 299.1230          | GQN              |
| 1856.6544    | 54.0               | 0.2         | [M-H] <sup>-</sup>     | 7       | 2      | 0      | 0     | 0                     | 387       | 299.1230          | GQN              |
| 1881.6887    | 52.6               | 1.3         | [M-H] <sup>-</sup>     | 4       | 3      | 2      | 0     | 0                     | 252       | 315.1179          | NNS              |
| 1881.6887    | 52.6               | 1.2         | [M-H] <sup>-</sup>     | 5       | 3      | 1      | 0     | 0                     | 387       | 299.1230          | GQN              |
| 1881.6887    | 52.6               | 4.7         | [M-H] <sup>-</sup>     | 4       | 4      | 0      | 0     | 1                     | 387       | 386.1550          | SGQN             |
| 1881.6887    | 52.6               | 1.2         | [M-H] <sup>-</sup>     | 5       | 4      | 0      | 0     | 0                     | 387       | 242.1015          | QN               |
| 1881.6887    | 52.6               | 1.2         | [M-H] <sup>-</sup>     | 5       | 4      | 0      | 0     | 0                     | 495       | 242.1015          | NQ               |
| 1963.7406    | 49.1               | 3.9         | [M-H] <sup>-</sup>     | 4       | 3      | 0      | 0     | 0                     | 387       | 689.2803          | SGQNVTC          |
| 1963.7406    | 49.1               | 3.9         | [M-H] <sup>-</sup>     | 4       | 3      | 0      | 0     | 0                     | 495       | 689.2803          | VNQTGSC          |
| 1963.7406    | 49.1               | 7.5         | [M-2H+Na] <sup>-</sup> | 5       | 3      | 1      | 0     | 1                     | 252       | 341.1699          | LNN              |
| 1963.7406    | 49.1               | 7.5         | [M-2H+Na] <sup>-</sup> | 5       | 3      | 1      | 0     | 1                     | 387       | 341.1699          | QNV              |
| 1963.7406    | 49.1               | 7.5         | [M-2H+Na] <sup>-</sup> | 5       | 3      | 1      | 0     | 1                     | 495       | 341.1699          | VNQ              |
| 1963.7406    | 49.1               | 0.6         | [M-H] <sup>-</sup>     | 3       | 4      | 0      | 1     | 0                     | 564       | 357.1648          | KND              |

|           |      |     |                        |   |   |   |   |   |     |          |       |
|-----------|------|-----|------------------------|---|---|---|---|---|-----|----------|-------|
| 1963.7406 | 49.1 | 6.0 | [M-2H+Na] <sup>-</sup> | 4 | 4 | 0 | 0 | 1 | 300 | 446.2278 | FGKN  |
| 1963.7406 | 49.1 | 0.6 | [M-H] <sup>-</sup>     | 3 | 5 | 1 | 0 | 0 | 387 | 299.1230 | GQN   |
| 1963.7406 | 49.1 | 0.6 | [M-H] <sup>-</sup>     | 3 | 6 | 0 | 0 | 0 | 387 | 242.1015 | QN    |
| 1963.7406 | 49.1 | 0.6 | [M-H] <sup>-</sup>     | 3 | 6 | 0 | 0 | 0 | 495 | 242.1015 | NQ    |
| 2180.7620 | 46.5 | 0.7 | [M-H] <sup>-</sup>     | 9 | 2 | 0 | 0 | 0 | 387 | 299.1230 | GQN   |
| 1694.6027 | 36.2 | 0.4 | [M-H] <sup>-</sup>     | 6 | 2 | 0 | 0 | 0 | 387 | 299.1230 | GQN   |
| 2105.7480 | 35.8 | 4.0 | [M-H] <sup>-</sup>     | 8 | 2 | 0 | 0 | 0 | 387 | 386.1550 | SGQN  |
| 1943.6912 | 31.7 | 2.3 | [M-H] <sup>-</sup>     | 7 | 2 | 0 | 0 | 0 | 387 | 386.1550 | SGQN  |
| 2233.7424 | 31.4 | 5.9 | [M-2H+Na] <sup>-</sup> | 9 | 2 | 0 | 0 | 0 | 252 | 330.1362 | CLN   |
| 2233.7424 | 31.4 | 2.5 | [M-2H+Na] <sup>-</sup> | 9 | 2 | 0 | 0 | 0 | 564 | 330.1176 | NDT   |
| 1719.6346 | 30.8 | 6.8 | [M-2H+Na] <sup>-</sup> | 5 | 2 | 0 | 0 | 1 | 300 | 446.2278 | FGKN  |
| 1719.6346 | 30.8 | 0.6 | [M-H] <sup>-</sup>     | 4 | 3 | 1 | 0 | 0 | 387 | 299.1230 | GQN   |
| 1719.6346 | 30.8 | 5.9 | [M-H] <sup>-</sup>     | 3 | 4 | 0 | 0 | 1 | 387 | 386.1550 | SGQN  |
| 1719.6346 | 30.8 | 0.6 | [M-H] <sup>-</sup>     | 4 | 4 | 0 | 0 | 0 | 387 | 242.1015 | QN    |
| 1719.6346 | 30.8 | 0.6 | [M-H] <sup>-</sup>     | 4 | 4 | 0 | 0 | 0 | 495 | 242.1015 | NQ    |
| 1897.6853 | 28.6 | 2.7 | [M-2H+Na] <sup>-</sup> | 5 | 2 | 0 | 0 | 0 | 387 | 642.2722 | QQSQN |
| 1532.5486 | 25.2 | 0.3 | [M-H] <sup>-</sup>     | 5 | 2 | 0 | 0 | 0 | 387 | 299.1230 | GQN   |
| 1938.7133 | 24.8 | 9.8 | [M-2H+Na] <sup>-</sup> | 7 | 2 | 0 | 0 | 1 | 252 | 341.1699 | LNN   |
| 1938.7133 | 24.8 | 9.8 | [M-2H+Na] <sup>-</sup> | 7 | 2 | 0 | 0 | 1 | 387 | 341.1699 | QNV   |
| 1938.7133 | 24.8 | 9.8 | [M-2H+Na] <sup>-</sup> | 7 | 2 | 0 | 0 | 1 | 495 | 341.1699 | VNQ   |
| 1938.7133 | 24.8 | 8.9 | [M-2H+Na] <sup>-</sup> | 7 | 2 | 0 | 0 | 1 | 564 | 341.2063 | VKN   |
| 2211.7622 | 24.1 | 5.1 | [M-H] <sup>-</sup>     | 9 | 2 | 0 | 0 | 0 | 252 | 330.1362 | CLN   |
| 2211.7622 | 24.1 | 3.3 | [M-H] <sup>-</sup>     | 9 | 2 | 0 | 0 | 0 | 564 | 330.1176 | NDT   |
| 2267.7971 | 23.6 | 2.1 | [M-H] <sup>-</sup>     | 9 | 2 | 0 | 0 | 0 | 387 | 386.1550 | SGQN  |
| 1840.6646 | 21.3 | 3.5 | [M-H] <sup>-</sup>     | 5 | 3 | 0 | 0 | 1 | 387 | 386.1550 | SGQN  |
| 1840.6646 | 21.3 | 2.6 | [M-H] <sup>-</sup>     | 6 | 3 | 0 | 0 | 0 | 387 | 242.1015 | QN    |

|           |      |     |                        |   |   |   |   |   |     |          |        |
|-----------|------|-----|------------------------|---|---|---|---|---|-----|----------|--------|
| 1840.6646 | 21.3 | 2.6 | [M-H] <sup>-</sup>     | 6 | 3 | 0 | 0 | 0 | 495 | 242.1015 | NQ     |
| 1781.6375 | 19.1 | 2.0 | [M-H] <sup>-</sup>     | 6 | 2 | 0 | 0 | 0 | 387 | 386.1550 | SGQN   |
| 1678.6118 | 17.9 | 3.8 | [M-H] <sup>-</sup>     | 4 | 3 | 0 | 0 | 1 | 387 | 386.1550 | SGQN   |
| 1678.6118 | 17.9 | 2.9 | [M-H] <sup>-</sup>     | 5 | 3 | 0 | 0 | 0 | 387 | 242.1015 | QN     |
| 1678.6118 | 17.9 | 2.9 | [M-H] <sup>-</sup>     | 5 | 3 | 0 | 0 | 0 | 495 | 242.1015 | NQ     |
| 1979.7401 | 17.4 | 3.6 | [M-H] <sup>-</sup>     | 8 | 2 | 0 | 0 | 1 | 300 | 242.1379 | KN     |
| 1979.7401 | 17.4 | 3.6 | [M-H] <sup>-</sup>     | 8 | 2 | 0 | 0 | 1 | 300 | 242.1379 | NK     |
| 1979.7401 | 17.4 | 3.6 | [M-H] <sup>-</sup>     | 8 | 2 | 0 | 0 | 1 | 564 | 242.1379 | KN     |
| 1947.6775 | 17.1 | 3.6 | [M-H] <sup>-</sup>     | 8 | 2 | 0 | 0 | 0 | 252 | 228.0859 | NN     |
| 1947.6775 | 17.1 | 8.8 | [M-2H+Na] <sup>-</sup> | 5 | 3 | 1 | 0 | 0 | 495 | 343.1492 | NQT    |
| 2071.6953 | 16.9 | 3.6 | [M-2H+Na] <sup>-</sup> | 8 | 2 | 0 | 0 | 0 | 252 | 330.1362 | CLN    |
| 2071.6953 | 16.9 | 5.4 | [M-2H+Na] <sup>-</sup> | 8 | 2 | 0 | 0 | 0 | 564 | 330.1176 | NDT    |
| 2049.7136 | 14.5 | 3.5 | [M-H] <sup>-</sup>     | 8 | 2 | 0 | 0 | 0 | 252 | 330.1362 | CLN    |
| 2049.7136 | 14.5 | 5.6 | [M-H] <sup>-</sup>     | 8 | 2 | 0 | 0 | 0 | 564 | 330.1176 | NDT    |
| 1872.6564 | 13.6 | 3.6 | [M-H] <sup>-</sup>     | 7 | 2 | 0 | 0 | 0 | 252 | 315.1179 | NNS    |
| 2109.7375 | 13.6 | 6.8 | [M-H] <sup>-</sup>     | 9 | 2 | 0 | 0 | 0 | 252 | 228.0859 | NN     |
| 1735.6320 | 12.8 | 2.6 | [M-2H+Na] <sup>-</sup> | 4 | 2 | 0 | 0 | 0 | 387 | 642.2722 | QQSGQN |
| 1735.6320 | 12.8 | 2.0 | [M-H] <sup>-</sup>     | 5 | 3 | 0 | 0 | 0 | 387 | 299.1230 | GQN    |
| 1735.6320 | 12.8 | 2.0 | [M-H] <sup>-</sup>     | 4 | 3 | 1 | 0 | 0 | 252 | 315.1179 | NNS    |
| 2149.7285 | 11.8 | 5.9 | [M-2H+Na] <sup>-</sup> | 9 | 2 | 0 | 0 | 1 | 252 | 228.0859 | NN     |
| 2023.7734 | 11.3 | 6.3 | [M-H] <sup>-</sup>     | 4 | 4 | 1 | 0 | 0 | 495 | 400.1707 | NQTG   |
| 2023.7734 | 11.3 | 0.8 | [M-H] <sup>-</sup>     | 3 | 5 | 0 | 0 | 1 | 495 | 487.2027 | NQTGS  |
| 2023.7734 | 11.3 | 6.3 | [M-H] <sup>-</sup>     | 4 | 5 | 0 | 0 | 0 | 495 | 343.1492 | NQT    |
| 2023.7734 | 11.3 | 6.1 | [M-H] <sup>-</sup>     | 3 | 5 | 2 | 0 | 0 | 387 | 213.1113 | NV     |
| 2023.7734 | 11.3 | 6.1 | [M-H] <sup>-</sup>     | 3 | 5 | 2 | 0 | 0 | 495 | 213.1113 | VN     |
| 1984.7245 | 10.0 | 3.8 | [M-H] <sup>-</sup>     | 6 | 2 | 0 | 0 | 0 | 387 | 589.2530 | NVTCAT |

|           |      |     |                        |   |   |   |   |   |     |          |       |
|-----------|------|-----|------------------------|---|---|---|---|---|-----|----------|-------|
| 1984.7245 | 10.0 | 5.6 | [M-H] <sup>-</sup>     | 6 | 3 | 0 | 0 | 0 | 387 | 386.1550 | SGQN  |
| 1984.7245 | 10.0 | 6.5 | [M-2H+Na] <sup>-</sup> | 4 | 4 | 0 | 0 | 0 | 387 | 485.2234 | SGQNV |
| 1984.7245 | 10.0 | 2.4 | [M-2H+Na] <sup>-</sup> | 3 | 5 | 0 | 0 | 0 | 252 | 444.1791 | CLNN  |
| 1991.6936 | 9.4  | 1.5 | [M-H] <sup>-</sup>     | 6 | 3 | 1 | 0 | 1 | 564 | 229.0699 | ND    |
| 1991.6936 | 9.4  | 4.7 | [M-2H+Na] <sup>-</sup> | 5 | 4 | 0 | 0 | 0 | 252 | 330.1362 | CLN   |
| 1991.6936 | 9.4  | 4.6 | [M-2H+Na] <sup>-</sup> | 5 | 4 | 0 | 0 | 0 | 564 | 330.1176 | NDT   |
| 1909.6423 | 8.8  | 4.0 | [M-2H+Na] <sup>-</sup> | 7 | 2 | 0 | 0 | 0 | 252 | 330.1362 | CLN   |
| 1909.6423 | 8.8  | 5.8 | [M-2H+Na] <sup>-</sup> | 7 | 2 | 0 | 0 | 0 | 564 | 330.1176 | NDT   |
| 2017.6947 | 8.6  | 8.2 | [M-2H+Na] <sup>-</sup> | 4 | 5 | 0 | 0 | 0 | 252 | 315.1179 | NNS   |
| 1887.6602 | 7.9  | 4.1 | [M-H] <sup>-</sup>     | 7 | 2 | 0 | 0 | 0 | 252 | 330.1362 | CLN   |
| 1887.6602 | 7.9  | 5.7 | [M-H] <sup>-</sup>     | 7 | 2 | 0 | 0 | 0 | 564 | 330.1176 | NDT   |
| 1982.7448 | 7.9  | 5.4 | [M-H] <sup>-</sup>     | 5 | 3 | 1 | 0 | 0 | 495 | 400.1707 | NQTG  |
| 1982.7448 | 7.9  | 0.3 | [M-H] <sup>-</sup>     | 4 | 4 | 0 | 0 | 1 | 495 | 487.2027 | NQTGS |
| 1982.7448 | 7.9  | 5.4 | [M-H] <sup>-</sup>     | 5 | 4 | 0 | 0 | 0 | 495 | 343.1492 | NQT   |
| 1982.7448 | 7.9  | 6.8 | [M-2H+Na] <sup>-</sup> | 3 | 4 | 1 | 0 | 0 | 387 | 499.2391 | GQNV  |
| 1982.7448 | 7.9  | 6.8 | [M-2H+Na] <sup>-</sup> | 3 | 4 | 1 | 0 | 0 | 495 | 499.2391 | VNQTG |
| 1982.7448 | 7.9  | 7.3 | [M-H] <sup>-</sup>     | 4 | 4 | 2 | 0 | 0 | 387 | 213.1113 | NV    |
| 1982.7448 | 7.9  | 7.3 | [M-H] <sup>-</sup>     | 4 | 4 | 2 | 0 | 0 | 495 | 213.1113 | VN    |
| 1982.7448 | 7.9  | 6.8 | [M-2H+Na] <sup>-</sup> | 3 | 5 | 0 | 0 | 0 | 387 | 442.2176 | QNV   |
| 1982.7448 | 7.9  | 6.8 | [M-2H+Na] <sup>-</sup> | 3 | 5 | 0 | 0 | 0 | 495 | 442.2176 | VNQT  |
| 1995.6868 | 7.8  | 9.4 | [M-2H+Na] <sup>-</sup> | 6 | 3 | 1 | 0 | 0 | 564 | 229.0699 | ND    |
| 2059.7510 | 7.0  | 8.7 | [M-2H+Na] <sup>-</sup> | 6 | 2 | 0 | 0 | 0 | 387 | 642.2722 | QQSQN |
| 1987.6761 | 6.9  | 6.6 | [M-2H+Na] <sup>-</sup> | 8 | 2 | 0 | 0 | 1 | 252 | 228.0859 | NN    |
| 1820.6870 | 6.7  | 3.2 | [M-H] <sup>-</sup>     | 4 | 3 | 1 | 0 | 0 | 495 | 400.1707 | NQTG  |
| 1820.6870 | 6.7  | 3.0 | [M-H] <sup>-</sup>     | 3 | 4 | 0 | 0 | 1 | 495 | 487.2027 | NQTGS |
| 1820.6870 | 6.7  | 3.2 | [M-H] <sup>-</sup>     | 4 | 4 | 0 | 0 | 0 | 495 | 343.1492 | NQT   |

|           |     |      |                        |   |   |   |   |   |     |          |        |
|-----------|-----|------|------------------------|---|---|---|---|---|-----|----------|--------|
| 2064.8005 | 6.4 | 7.7  | [M-2H+Na] <sup>-</sup> | 7 | 2 | 0 | 0 | 0 | 300 | 485.2710 | NKSR   |
| 2064.8005 | 6.4 | 2.5  | [M-H] <sup>-</sup>     | 4 | 3 | 1 | 0 | 0 | 252 | 644.2952 | LCLNNS |
| 2210.7727 | 6.4 | 9.3  | [M-2H+Na] <sup>-</sup> | 6 | 3 | 0 | 0 | 0 | 495 | 590.2119 | NQTGSC |
| 2210.7727 | 6.4 | 2.1  | [M-2H+Na] <sup>-</sup> | 6 | 3 | 1 | 0 | 0 | 252 | 444.1791 | CLNN   |
| 2210.7727 | 6.4 | 7.2  | [M-2H+Na] <sup>-</sup> | 5 | 4 | 0 | 0 | 1 | 252 | 531.2111 | CLNNS  |
| 2026.7513 | 6.0 | 9.9  | [M-H] <sup>-</sup>     | 6 | 2 | 0 | 0 | 1 | 387 | 613.2820 | QSGQNV |
| 2026.7513 | 6.0 | 4.4  | [M-H] <sup>-</sup>     | 6 | 3 | 0 | 0 | 0 | 252 | 428.2019 | LNNS   |
| 2026.7513 | 6.0 | 4.4  | [M-H] <sup>-</sup>     | 5 | 3 | 1 | 0 | 0 | 252 | 444.1791 | CLNN   |
| 2026.7513 | 6.0 | 1.7  | [M-2H+Na] <sup>-</sup> | 3 | 4 | 0 | 1 | 0 | 387 | 398.1914 | GQNV   |
| 2026.7513 | 6.0 | 1.2  | [M-H] <sup>-</sup>     | 4 | 4 | 0 | 0 | 1 | 252 | 531.2111 | CLNNS  |
| 2179.7459 | 5.9 | 8.4  | [M-2H+Na] <sup>-</sup> | 3 | 5 | 0 | 1 | 1 | 564 | 330.1176 | NDT    |
| 2179.7459 | 5.9 | 8.4  | [M-2H+Na] <sup>-</sup> | 5 | 5 | 0 | 0 | 0 | 252 | 315.1179 | NNS    |
| 1776.6600 | 5.9 | 10.0 | [M-2H+Na] <sup>-</sup> | 6 | 2 | 0 | 0 | 1 | 564 | 341.2063 | VKN    |
| 1776.6600 | 5.9 | 3.4  | [M-2H+Na] <sup>-</sup> | 3 | 3 | 0 | 0 | 0 | 387 | 642.2722 | QQSGQN |
| 1776.6600 | 5.9 | 2.8  | [M-H] <sup>-</sup>     | 4 | 4 | 0 | 0 | 0 | 387 | 299.1230 | GQN    |
| 1776.6600 | 5.9 | 2.8  | [M-H] <sup>-</sup>     | 3 | 4 | 1 | 0 | 0 | 252 | 315.1179 | NNS    |
| 2153.7495 | 5.9 | 8.1  | [M-2H+Na] <sup>-</sup> | 5 | 3 | 1 | 0 | 1 | 252 | 531.2111 | CLNNS  |
| 2153.7495 | 5.9 | 2.9  | [M-2H+Na] <sup>-</sup> | 6 | 4 | 0 | 0 | 0 | 252 | 330.1362 | CLN    |
| 2153.7495 | 5.9 | 5.7  | [M-2H+Na] <sup>-</sup> | 6 | 4 | 0 | 0 | 0 | 564 | 330.1176 | NDT    |
| 1637.5906 | 5.9 | 0.7  | [M-H] <sup>-</sup>     | 5 | 2 | 0 | 0 | 1 | 387 | 386.1550 | SGQN   |
| 1637.5906 | 5.9 | 6.2  | [M-H] <sup>-</sup>     | 6 | 2 | 0 | 0 | 0 | 387 | 242.1015 | QN     |
| 1637.5906 | 5.9 | 6.2  | [M-H] <sup>-</sup>     | 6 | 2 | 0 | 0 | 0 | 495 | 242.1015 | NQ     |
| 1637.5906 | 5.9 | 8.5  | [M-2H+Na] <sup>-</sup> | 4 | 3 | 0 | 0 | 0 | 252 | 341.1699 | LNN    |
| 1637.5906 | 5.9 | 8.5  | [M-2H+Na] <sup>-</sup> | 4 | 3 | 0 | 0 | 0 | 387 | 341.1699 | QNV    |
| 1637.5906 | 5.9 | 8.5  | [M-2H+Na] <sup>-</sup> | 4 | 3 | 0 | 0 | 0 | 495 | 341.1699 | VNQ    |
| 1637.5906 | 5.9 | 8.5  | [M-2H+Na] <sup>-</sup> | 3 | 3 | 1 | 0 | 0 | 564 | 357.1648 | KND    |

|           |     |      |                        |   |   |   |   |   |     |          |         |
|-----------|-----|------|------------------------|---|---|---|---|---|-----|----------|---------|
| 1969.7115 | 5.8 | 10.0 | [M-2H+Na] <sup>-</sup> | 3 | 3 | 0 | 0 | 1 | 387 | 817.3389 | QSQNVTC |
| 1969.7115 | 5.8 | 4.3  | [M-2H+Na] <sup>-</sup> | 4 | 3 | 0 | 0 | 0 | 387 | 673.2854 | GQNVTC  |
| 1969.7115 | 5.8 | 4.3  | [M-2H+Na] <sup>-</sup> | 3 | 3 | 1 | 0 | 0 | 387 | 689.2803 | SGQNVTC |
| 1969.7115 | 5.8 | 4.3  | [M-2H+Na] <sup>-</sup> | 3 | 3 | 1 | 0 | 0 | 495 | 689.2803 | VNQTGSC |
| 1969.7115 | 5.8 | 7.6  | [M-2H+Na] <sup>-</sup> | 3 | 4 | 0 | 1 | 0 | 252 | 341.1699 | LNN     |
| 1969.7115 | 5.8 | 7.6  | [M-2H+Na] <sup>-</sup> | 3 | 4 | 0 | 1 | 0 | 387 | 341.1699 | QNV     |
| 1969.7115 | 5.8 | 7.6  | [M-2H+Na] <sup>-</sup> | 3 | 4 | 0 | 1 | 0 | 495 | 341.1699 | VNQ     |
| 1969.7115 | 5.8 | 4.8  | [M-H] <sup>-</sup>     | 5 | 4 | 0 | 0 | 0 | 252 | 330.1362 | CLN     |
| 1969.7115 | 5.8 | 4.6  | [M-H] <sup>-</sup>     | 5 | 4 | 0 | 0 | 0 | 564 | 330.1176 | NDT     |
| 1969.7115 | 5.8 | 7.6  | [M-2H+Na] <sup>-</sup> | 3 | 5 | 0 | 0 | 0 | 564 | 429.1860 | NDTV    |
| 1961.7052 | 5.7 | 8.8  | [M-H] <sup>-</sup>     | 8 | 2 | 0 | 0 | 0 | 300 | 242.1379 | KN      |
| 1961.7052 | 5.7 | 8.8  | [M-H] <sup>-</sup>     | 8 | 2 | 0 | 0 | 0 | 300 | 242.1379 | NK      |
| 1961.7052 | 5.7 | 4.0  | [M-H] <sup>-</sup>     | 7 | 2 | 0 | 0 | 1 | 387 | 386.1550 | SGQN    |
| 1961.7052 | 5.7 | 9.7  | [M-H] <sup>-</sup>     | 8 | 2 | 0 | 0 | 0 | 387 | 242.1015 | QN      |
| 1961.7052 | 5.7 | 9.7  | [M-H] <sup>-</sup>     | 8 | 2 | 0 | 0 | 0 | 495 | 242.1015 | NQ      |
| 1961.7052 | 5.7 | 8.8  | [M-H] <sup>-</sup>     | 8 | 2 | 0 | 0 | 0 | 564 | 242.1379 | KN      |
| 2141.8037 | 5.4 | 8.3  | [M-H] <sup>-</sup>     | 9 | 2 | 0 | 0 | 1 | 300 | 242.1379 | KN      |
| 2141.8037 | 5.4 | 8.3  | [M-H] <sup>-</sup>     | 9 | 2 | 0 | 0 | 1 | 300 | 242.1379 | NK      |
| 2141.8037 | 5.4 | 8.3  | [M-H] <sup>-</sup>     | 9 | 2 | 0 | 0 | 1 | 564 | 242.1379 | KN      |
| 2339.8484 | 5.3 | 2.1  | [M-H] <sup>-</sup>     | 8 | 2 | 0 | 0 | 1 | 387 | 602.2483 | GQNVTC  |
| 2339.8484 | 5.3 | 0.7  | [M-H] <sup>-</sup>     | 9 | 2 | 0 | 0 | 0 | 564 | 458.2125 | KNDT    |
| 1829.6407 | 5.2 | 1.7  | [M-H] <sup>-</sup>     | 5 | 3 | 1 | 0 | 1 | 564 | 229.0699 | ND      |
| 1829.6407 | 5.2 | 5.2  | [M-2H+Na] <sup>-</sup> | 4 | 4 | 0 | 0 | 0 | 252 | 330.1362 | CLN     |
| 1829.6407 | 5.2 | 5.0  | [M-2H+Na] <sup>-</sup> | 4 | 4 | 0 | 0 | 0 | 564 | 330.1176 | NDT     |
| 2048.7153 | 5.0 | 7.8  | [M-2H+Na] <sup>-</sup> | 5 | 3 | 0 | 0 | 0 | 495 | 590.2119 | NQTGSC  |
| 2048.7153 | 5.0 | 4.5  | [M-2H+Na] <sup>-</sup> | 5 | 3 | 1 | 0 | 0 | 252 | 444.1791 | CLNN    |

|           |     |     |                        |   |   |   |   |   |     |          |        |
|-----------|-----|-----|------------------------|---|---|---|---|---|-----|----------|--------|
| 2048.7153 | 5.0 | 9.9 | [M-2H+Na] <sup>-</sup> | 4 | 4 | 0 | 0 | 1 | 252 | 531.2111 | CLNNS  |
| 2048.7153 | 5.0 | 1.4 | [M-H] <sup>-</sup>     | 6 | 4 | 0 | 0 | 1 | 564 | 229.0699 | ND     |
| 2172.7942 | 4.9 | 1.3 | [M-H] <sup>-</sup>     | 7 | 2 | 0 | 0 | 0 | 564 | 615.2653 | NDTVW  |
| 2123.7527 | 4.7 | 1.2 | [M-H] <sup>-</sup>     | 8 | 2 | 0 | 0 | 1 | 387 | 386.1550 | SGQN   |
| 2123.7527 | 4.7 | 6.5 | [M-H] <sup>-</sup>     | 9 | 2 | 0 | 0 | 0 | 387 | 242.1015 | QN     |
| 2123.7527 | 4.7 | 6.5 | [M-H] <sup>-</sup>     | 9 | 2 | 0 | 0 | 0 | 495 | 242.1015 | NQ     |
| 2251.7935 | 4.7 | 6.8 | [M-H] <sup>-</sup>     | 8 | 2 | 0 | 0 | 1 | 387 | 514.2136 | QSGQN  |
| 2276.8228 | 4.6 | 7.7 | [M-H] <sup>-</sup>     | 6 | 3 | 1 | 0 | 1 | 387 | 514.2136 | QSGQN  |
| 2276.8228 | 4.6 | 2.8 | [M-H] <sup>-</sup>     | 4 | 6 | 1 | 0 | 1 | 564 | 229.0699 | ND     |
| 1619.5916 | 4.5 | 6.4 | [M-H] <sup>-</sup>     | 5 | 2 | 0 | 0 | 0 | 387 | 386.1550 | SGQN   |
| 2229.8159 | 4.3 | 0.5 | [M-2H+Na] <sup>-</sup> | 9 | 2 | 0 | 0 | 0 | 495 | 326.1954 | IVN    |
| 2229.8159 | 4.3 | 8.6 | [M-H] <sup>-</sup>     | 5 | 4 | 0 | 0 | 0 | 495 | 590.2119 | NQTGSC |
| 2229.8159 | 4.3 | 2.7 | [M-H] <sup>-</sup>     | 5 | 4 | 1 | 0 | 0 | 252 | 444.1791 | CLNN   |
| 2229.8159 | 4.3 | 7.7 | [M-H] <sup>-</sup>     | 4 | 5 | 0 | 0 | 1 | 252 | 531.2111 | CLNNS  |
| 1779.6631 | 4.3 | 1.6 | [M-H] <sup>-</sup>     | 4 | 3 | 0 | 0 | 1 | 495 | 487.2027 | NQTGS  |
| 1779.6631 | 4.3 | 4.7 | [M-H] <sup>-</sup>     | 5 | 3 | 0 | 0 | 0 | 495 | 343.1492 | NQT    |

Table S-2

| Glycopeptide Mass (Da) | Relative Intensity (%) | Error (ppm) | Charge State           | Glycans |        |        | NeuAc | H <sub>2</sub> O loss | Glycosite | Peptide Mass (Da) | Peptide Sequence |
|------------------------|------------------------|-------------|------------------------|---------|--------|--------|-------|-----------------------|-----------|-------------------|------------------|
|                        |                        |             |                        | Hex     | HexNAc | Fucose |       |                       |           |                   |                  |
| 2080.6799              | 100.0                  | 0.5         | [M+2Na-H] <sup>+</sup> | 8       | 2      | 0      | 0     | 0                     | 252       | 315.1179          | NNS              |
| 2242.7275              | 88.6                   | 2.8         | [M+2Na-H] <sup>+</sup> | 9       | 2      | 0      | 0     | 0                     | 252       | 315.1179          | NNS              |
| 2058.7026              | 45.0                   | 1.8         | [M+Na] <sup>+</sup>    | 8       | 2      | 0      | 0     | 0                     | 252       | 315.1179          | NNS              |
| 1918.6293              | 42.9                   | 0.6         | [M+2Na-H] <sup>+</sup> | 7       | 2      | 0      | 0     | 0                     | 252       | 315.1179          | NNS              |
| 2220.7507              | 35.9                   | 0.5         | [M+Na] <sup>+</sup>    | 9       | 2      | 0      | 0     | 0                     | 252       | 315.1179          | NNS              |
| 2214.8010              | 31.2                   | 1.4         | [M+Na] <sup>+</sup>    | 7       | 2      | 0      | 0     | 1                     | 564       | 615.2653          | NDTVW            |
| 1968.6946              | 29.9                   | 1.3         | [M+Na] <sup>+</sup>    | 6       | 2      | 0      | 0     | 1                     | 252       | 531.2111          | CLNNS            |
| 1896.6497              | 24.7                   | 1.8         | [M+Na] <sup>+</sup>    | 7       | 2      | 0      | 0     | 0                     | 252       | 315.1179          | NNS              |
| 1683.5618              | 23.8                   | 1.7         | [M+2Na-H] <sup>+</sup> | 6       | 2      | 0      | 0     | 0                     | 387       | 242.1015          | QN               |
| 1683.5618              | 23.8                   | 1.7         | [M+2Na-H] <sup>+</sup> | 6       | 2      | 0      | 0     | 0                     | 495       | 242.1015          | NQ               |
| 1562.5366              | 22.5                   | 2.6         | [M+2Na-H] <sup>+</sup> | 4       | 3      | 0      | 0     | 0                     | 387       | 242.1015          | QN               |
| 1562.5366              | 22.5                   | 2.6         | [M+2Na-H] <sup>+</sup> | 4       | 3      | 0      | 0     | 0                     | 495       | 242.1015          | NQ               |
| 1603.5638              | 22.2                   | 2.9         | [M+2Na-H] <sup>+</sup> | 3       | 4      | 0      | 0     | 0                     | 387       | 242.1015          | QN               |
| 1603.5638              | 22.2                   | 2.9         | [M+2Na-H] <sup>+</sup> | 3       | 4      | 0      | 0     | 0                     | 495       | 242.1015          | NQ               |
| 1927.6699              | 21.0                   | 2.6         | [M+2Na-H] <sup>+</sup> | 5       | 4      | 0      | 0     | 0                     | 387       | 242.1015          | QN               |
| 1927.6699              | 21.0                   | 2.6         | [M+2Na-H] <sup>+</sup> | 5       | 4      | 0      | 0     | 0                     | 495       | 242.1015          | NQ               |
| 2192.8235              | 18.4                   | 2.4         | [M+H] <sup>+</sup>     | 8       | 2      | 0      | 0     | 0                     | 252       | 471.2190          | NNSR             |
| 2192.8235              | 18.4                   | 0.6         | [M+H] <sup>+</sup>     | 7       | 2      | 0      | 0     | 1                     | 564       | 615.2653          | NDTVW            |
| 2376.8562              | 16.5                   | 1.4         | [M+Na] <sup>+</sup>    | 9       | 2      | 0      | 0     | 0                     | 252       | 471.2190          | NNSR             |
| 2376.8562              | 16.5                   | 0.3         | [M+Na] <sup>+</sup>    | 8       | 2      | 0      | 0     | 1                     | 564       | 615.2653          | NDTVW            |
| 1756.5778              | 16.2                   | 1.4         | [M+2Na-H] <sup>+</sup> | 6       | 2      | 0      | 0     | 0                     | 252       | 315.1179          | NNS              |
| 2009.7250              | 14.3                   | 2.6         | [M+Na] <sup>+</sup>    | 7       | 2      | 0      | 0     | 0                     | 252       | 428.2019          | LNNS             |

|           |      |     |                        |   |   |   |   |   |     |          |       |
|-----------|------|-----|------------------------|---|---|---|---|---|-----|----------|-------|
| 1946.7141 | 13.5 | 0.6 | [M+H] <sup>+</sup>     | 6 | 2 | 0 | 0 | 1 | 252 | 531.2111 | CLNNS |
| 1734.5951 | 13.0 | 1.0 | [M+Na] <sup>+</sup>    | 6 | 2 | 0 | 0 | 0 | 252 | 315.1179 | NNS   |
| 1661.5815 | 11.9 | 2.8 | [M+Na] <sup>+</sup>    | 6 | 2 | 0 | 0 | 0 | 387 | 242.1015 | QN    |
| 1661.5815 | 11.9 | 2.8 | [M+Na] <sup>+</sup>    | 6 | 2 | 0 | 0 | 0 | 495 | 242.1015 | NQ    |
| 2354.8709 | 10.5 | 0.0 | [M+H] <sup>+</sup>     | 9 | 2 | 0 | 0 | 0 | 252 | 471.2190 | NNSR  |
| 2354.8709 | 10.5 | 1.8 | [M+H] <sup>+</sup>     | 8 | 2 | 0 | 0 | 1 | 564 | 615.2653 | NDTVW |
| 1905.6898 | 9.9  | 3.6 | [M+Na] <sup>+</sup>    | 5 | 4 | 0 | 0 | 0 | 387 | 242.1015 | QN    |
| 1905.6898 | 9.9  | 3.6 | [M+Na] <sup>+</sup>    | 5 | 4 | 0 | 0 | 0 | 495 | 242.1015 | NQ    |
| 1499.5266 | 9.7  | 1.7 | [M+Na] <sup>+</sup>    | 5 | 2 | 0 | 0 | 0 | 387 | 242.1015 | QN    |
| 1499.5266 | 9.7  | 1.7 | [M+Na] <sup>+</sup>    | 5 | 2 | 0 | 0 | 0 | 495 | 242.1015 | NQ    |
| 2052.7500 | 8.2  | 1.3 | [M+Na] <sup>+</sup>    | 7 | 2 | 0 | 0 | 0 | 252 | 471.2190 | NNSR  |
| 2052.7500 | 8.2  | 0.6 | [M+Na] <sup>+</sup>    | 6 | 2 | 0 | 0 | 1 | 564 | 615.2653 | NDTVW |
| 1790.6473 | 6.8  | 5.1 | [M+Na] <sup>+</sup>    | 5 | 3 | 0 | 0 | 0 | 252 | 330.1362 | CLN   |
| 1665.5632 | 6.4  | 5.2 | [M+Na] <sup>+</sup>    | 6 | 2 | 0 | 0 | 1 | 252 | 228.0859 | NN    |
| 1724.5911 | 6.4  | 3.3 | [M+2Na-H] <sup>+</sup> | 4 | 3 | 0 | 0 | 1 | 387 | 386.1550 | SGQN  |
| 1987.7461 | 5.9  | 1.1 | [M+H] <sup>+</sup>     | 7 | 2 | 0 | 0 | 0 | 252 | 428.2019 | LNNS  |
| 2069.7590 | 5.1  | 8.4 | [M+Na] <sup>+</sup>    | 8 | 2 | 0 | 0 | 0 | 495 | 326.1954 | IVN   |
| 2069.7590 | 5.1  | 6.4 | [M+H] <sup>+</sup>     | 8 | 2 | 0 | 0 | 1 | 252 | 330.1362 | CLN   |
| 1442.4916 | 4.9  | 7.0 | [M+2Na-H] <sup>+</sup> | 3 | 2 | 0 | 0 | 0 | 495 | 487.2027 | NQTGS |
| 2030.7782 | 4.8  | 6.3 | [M+H] <sup>+</sup>     | 7 | 2 | 0 | 0 | 0 | 252 | 471.2190 | NNSR  |
| 2030.7782 | 4.8  | 4.4 | [M+H] <sup>+</sup>     | 6 | 2 | 0 | 0 | 1 | 564 | 615.2653 | NDTVW |
| 2028.7245 | 4.7  | 0.2 | [M+Na] <sup>+</sup>    | 7 | 2 | 0 | 0 | 1 | 564 | 429.1860 | NDTV  |
| 2235.7761 | 4.2  | 2.7 | [M+Na] <sup>+</sup>    | 9 | 2 | 0 | 0 | 0 | 252 | 330.1362 | CLN   |
| 2257.7595 | 4.0  | 3.3 | [M+2Na-H] <sup>+</sup> | 9 | 2 | 0 | 0 | 0 | 252 | 330.1362 | CLN   |
| 1765.6140 | 4.0  | 1.1 | [M+2Na-H] <sup>+</sup> | 4 | 3 | 1 | 0 | 0 | 387 | 299.1230 | GQN   |
| 2067.7813 | 3.9  | 4.6 | [M+Na] <sup>+</sup>    | 5 | 3 | 1 | 0 | 1 | 252 | 443.2202 | LCLN  |

|           |     |     |               |   |   |   |   |   |     |          |       |
|-----------|-----|-----|---------------|---|---|---|---|---|-----|----------|-------|
| 2067.7813 | 3.9 | 0.5 | $[M+2Na-H]^+$ | 3 | 4 | 1 | 0 | 1 | 252 | 542.2561 | NNSRA |
| 1572.5450 | 3.8 | 2.9 | $[M+Na]^+$    | 5 | 2 | 0 | 0 | 0 | 252 | 315.1179 | NNS   |
| 2110.7839 | 3.7 | 2.4 | $[M+H]^+$     | 9 | 2 | 0 | 0 | 0 | 252 | 227.1270 | LN    |
| 1594.5297 | 3.7 | 4.5 | $[M+2Na-H]^+$ | 5 | 2 | 0 | 0 | 0 | 252 | 315.1179 | NNS   |
| 2047.7677 | 3.7 | 7.8 | $[M+H]^+$     | 7 | 2 | 0 | 0 | 0 | 387 | 488.2053 | NVTCA |
| 2197.7883 | 3.6 | 1.7 | $[M+Na]^+$    | 7 | 2 | 0 | 0 | 0 | 387 | 616.2639 | QNVTC |
| 1749.6157 | 3.6 | 2.3 | $[M+Na]^+$    | 6 | 2 | 0 | 0 | 0 | 252 | 330.1362 | CLN   |
| 1546.5441 | 3.3 | 4.1 | $[M+2Na-H]^+$ | 4 | 2 | 0 | 0 | 0 | 564 | 429.1860 | NDTV  |
| 1984.6932 | 3.3 | 3.5 | $[M+2Na-H]^+$ | 4 | 4 | 1 | 0 | 0 | 252 | 315.1179 | NNS   |
| 1984.6932 | 3.3 | 3.5 | $[M+2Na-H]^+$ | 5 | 4 | 0 | 0 | 0 | 387 | 299.1230 | GQN   |
| 2095.6975 | 3.2 | 0.8 | $[M+2Na-H]^+$ | 8 | 2 | 0 | 0 | 0 | 252 | 330.1362 | CLN   |
| 2095.6975 | 3.2 | 8.1 | $[M+2Na-H]^+$ | 8 | 2 | 0 | 0 | 0 | 564 | 330.1176 | NDT   |

Table S-3

| GP Mass (Da) | Relative Intensity (%) | Error (ppm) | Charge State           | Glycans |        |       | H <sub>2</sub> O loss | Glycosite | Peptide Mass (Da) | Peptide Sequence |
|--------------|------------------------|-------------|------------------------|---------|--------|-------|-----------------------|-----------|-------------------|------------------|
|              |                        |             |                        | Gal     | GalNAc | NeuAc |                       |           |                   |                  |
| 1152.4810    | 100.0                  | 0.7         | [M-H] <sup>-</sup>     | 1       | 1      | 0     | 0                     | 152/154   | 770.3446          | GEPTSTPT         |
| 1517.6102    | 75.5                   | 1.4         | [M-H] <sup>-</sup>     | 2       | 2      | 0     | 0                     | 152 & 154 | 770.3446          | GEPTSTPT         |
| 1443.5753    | 67.9                   | 0.2         | [M-H] <sup>-</sup>     | 1       | 1      | 1     | 0                     | 152/154   | 770.3446          | GEPTSTPT         |
| 1808.7067    | 45.7                   | 0.6         | [M-H] <sup>-</sup>     | 2       | 2      | 1     | 0                     | 152 & 154 | 770.3446          | GEPTSTPT         |
| 1734.6709    | 15.0                   | 0.0         | [M-H] <sup>-</sup>     | 1       | 1      | 2     | 0                     | 152/154   | 770.3446          | GEPTSTPT         |
| 2099.8059    | 14.8                   | 1.3         | [M-H] <sup>-</sup>     | 2       | 2      | 2     | 0                     | 152 & 154 | 770.3446          | GEPTSTPT         |
| 1465.5597    | 12.3                   | 1.5         | [M-2H+Na] <sup>-</sup> | 1       | 1      | 1     | 0                     | 152/154   | 770.3446          | GEPTSTPT         |
| 1830.6912    | 11.4                   | 0.8         | [M-2H+Na] <sup>-</sup> | 2       | 2      | 1     | 0                     | 152 & 154 | 770.3446          | GEPTSTPT         |
| 1355.5631    | 11.3                   | 2.7         | [M-H] <sup>-</sup>     | 1       | 2      | 0     | 0                     | 152 & 154 | 770.3446          | GEPTSTPT         |
| 1355.5631    | 11.3                   | 4.4         | [M-2H+Na] <sup>-</sup> | 1       | 1      | 1     | 1                     | 186       | 642.3337          | NTVQVT           |
| 1525.5928    | 7.8                    | 1.2         | [M-H] <sup>-</sup>     | 2       | 2      | 1     | 0                     | 152 & 154 | 487.2278          | TSTPT            |
| 1557.5726    | 7.3                    | 2.7         | [M-2H+Na] <sup>-</sup> | 1       | 2      | 1     | 0                     | 152 & 154 | 659.2762          | SGEPTST          |
| 1399.5885    | 5.2                    | 2.0         | [M-H] <sup>-</sup>     | 1       | 2      | 0     | 0                     | 152 & 154 | 814.3709          | EPTSTPTT         |
| 1399.5885    | 5.2                    | 2.0         | [M-H] <sup>-</sup>     | 0       | 2      | 1     | 0                     | 152 & 154 | 685.3283          | PTSTPTT          |
| 1399.5885    | 5.2                    | 2.0         | [M-H] <sup>-</sup>     | 1       | 2      | 0     | 0                     | 152 & 154 | 814.3709          | PTSTPTTE         |
| 1399.5885    | 5.2                    | 3.7         | [M-2H+Na] <sup>-</sup> | 1       | 1      | 1     | 1                     | 186       | 686.3599          | QVTSTAV          |
| 1399.5885    | 5.2                    | 3.7         | [M-2H+Na] <sup>-</sup> | 1       | 1      | 1     | 1                     | 186       | 686.3599          | VQVTSTA          |
| 1790.6996    | 5.1                    | 2.7         | [M-2H+Na] <sup>-</sup> | 1       | 1      | 2     | 1                     | 163       | 786.3759          | EAVESTVA         |
| 1756.6536    | 4.9                    | 0.4         | [M-2H+Na] <sup>-</sup> | 1       | 1      | 2     | 0                     | 152/154   | 770.3446          | GEPTSTPT         |
| 1273.5107    | 4.4                    | 3.4         | [M-H] <sup>-</sup>     | 1       | 1      | 1     | 0                     | 154       | 600.2755          | TPTEA            |
| 2121.7896    | 4.4                    | 2.1         | [M-2H+Na] <sup>-</sup> | 2       | 2      | 2     | 0                     | 152 & 154 | 770.3446          | GEPTSTPT         |
| 1816.6913    | 3.8                    | 2.7         | [M-H] <sup>-</sup>     | 2       | 2      | 2     | 0                     | 152 & 154 | 487.2278          | TSTPT            |
| 1816.6913    | 3.8                    | 2.7         | [M-H] <sup>-</sup>     | 2       | 2      | 2     | 0                     | 152 & 154 | 487.2278          | TSTPT            |

|           |     |     |                        |   |   |   |   |           |          |           |
|-----------|-----|-----|------------------------|---|---|---|---|-----------|----------|-----------|
| 2390.8989 | 3.8 | 0.2 | [M-H] <sup>-</sup>     | 2 | 2 | 3 | 0 | 152 & 154 | 770.3446 | GEPTSTPT  |
| 1646.6595 | 3.8 | 2.8 | [M-H] <sup>-</sup>     | 1 | 2 | 1 | 0 | 152 & 154 | 770.3446 | GEPTSTPT  |
| 1234.4983 | 3.5 | 2.3 | [M-H] <sup>-</sup>     | 2 | 2 | 0 | 0 | 152 & 154 | 487.2278 | TSTPT     |
| 1539.5975 | 3.3 | 5.9 | [M-H] <sup>-</sup>     | 2 | 2 | 1 | 1 | 152 & 154 | 483.2329 | PTSTP     |
| 1539.5975 | 3.3 | 2.1 | [M-2H+Na] <sup>-</sup> | 2 | 2 | 0 | 0 | 152 & 154 | 770.3446 | GEPTSTPT  |
| 1720.6963 | 3.3 | 4.1 | [M-2H+Na] <sup>-</sup> | 1 | 1 | 2 | 1 | 186       | 716.3705 | TVQVTST   |
| 982.4111  | 3.2 | 0.1 | [M-H] <sup>-</sup>     | 1 | 1 | 0 | 0 | 154       | 600.2755 | TPTEA     |
| 1381.5743 | 2.3 | 1.2 | [M-2H+Na] <sup>-</sup> | 0 | 1 | 1 | 1 | 163       | 830.4022 | ESTVATLE  |
| 1381.5743 | 2.3 | 1.2 | [M-2H+Na] <sup>-</sup> | 1 | 1 | 1 | 0 | 186       | 686.3599 | QVTSTAV   |
| 1381.5743 | 2.3 | 1.2 | [M-2H+Na] <sup>-</sup> | 1 | 1 | 1 | 0 | 186       | 686.3599 | VQVTSTA   |
| 1381.5743 | 2.3 | 7.0 | [M-2H+Na] <sup>-</sup> | 0 | 1 | 1 | 1 | 186       | 830.4134 | NTVQVTST  |
| 1547.5737 | 2.1 | 0.6 | [M-2H+Na] <sup>-</sup> | 2 | 2 | 1 | 0 | 152 & 154 | 487.2278 | TSTPT     |
| 681.2856  | 2.0 | 3.0 | [M-H] <sup>-</sup>     | 1 | 1 | 0 | 0 | 154       | 299.1481 | TPT       |
| 1295.4924 | 2.0 | 3.2 | [M-2H+Na] <sup>-</sup> | 1 | 1 | 1 | 0 | 154       | 600.2755 | TPTEA     |
| 1178.5320 | 2.0 | 0.1 | [M-H] <sup>-</sup>     | 0 | 1 | 1 | 0 | 142       | 667.3541 | EIPTIN    |
| 1360.5438 | 2.0 | 4.0 | [M-H] <sup>-</sup>     | 1 | 1 | 1 | 1 | 152/154   | 669.2970 | GEPTSTP   |
| 1360.5438 | 2.0 | 4.0 | [M-H] <sup>-</sup>     | 1 | 1 | 1 | 0 | 154       | 687.3075 | STPTTEA   |
| 1337.5499 | 2.0 | 2.5 | [M-2H+Na] <sup>-</sup> | 0 | 1 | 1 | 1 | 163       | 786.3759 | EAVESTVA  |
| 1337.5499 | 2.0 | 2.5 | [M-2H+Na] <sup>-</sup> | 1 | 1 | 1 | 0 | 186       | 642.3337 | NTVQVT    |
| 1451.5638 | 1.9 | 6.7 | [M-H] <sup>-</sup>     | 1 | 1 | 2 | 0 | 152/154   | 487.2278 | TSTPT     |
| 1451.5638 | 1.9 | 6.7 | [M-H] <sup>-</sup>     | 1 | 1 | 2 | 0 | 154       | 487.2278 | STPTT     |
| 1451.5638 | 1.9 | 6.7 | [M-H] <sup>-</sup>     | 1 | 1 | 2 | 0 | 163       | 487.2278 | AVEST     |
| 1451.5638 | 1.9 | 6.7 | [M-H] <sup>-</sup>     | 1 | 1 | 2 | 0 | 163       | 487.2278 | ESTVA     |
| 1690.6838 | 1.9 | 1.6 | [M-H] <sup>-</sup>     | 1 | 2 | 1 | 0 | 152 & 154 | 814.3709 | EPTSTPTT  |
| 1690.6838 | 1.9 | 1.6 | [M-H] <sup>-</sup>     | 0 | 2 | 2 | 0 | 152 & 154 | 685.3283 | PTSTPTT   |
| 1690.6838 | 1.9 | 1.6 | [M-H] <sup>-</sup>     | 2 | 2 | 0 | 0 | 152 & 154 | 943.4135 | EPTSTPTTE |

|           |     |     |                        |   |   |   |   |           |           |            |
|-----------|-----|-----|------------------------|---|---|---|---|-----------|-----------|------------|
| 1690.6838 | 1.9 | 1.6 | [M-H] <sup>-</sup>     | 1 | 2 | 1 | 0 | 152 & 154 | 814.3709  | PTSTPTTE   |
| 1690.6838 | 1.9 | 3.0 | [M-2H+Na] <sup>-</sup> | 1 | 1 | 2 | 1 | 186       | 686.3599  | QVTSTAV    |
| 1690.6838 | 1.9 | 3.0 | [M-2H+Na] <sup>-</sup> | 1 | 1 | 2 | 1 | 186       | 686.3599  | VQVTSTA    |
| 1626.6429 | 1.8 | 2.7 | [M-H] <sup>-</sup>     | 2 | 2 | 1 | 0 | 152 & 154 | 588.2755  | TSTPTT     |
| 1746.7076 | 1.8 | 6.3 | [M-H] <sup>-</sup>     | 0 | 2 | 1 | 1 | 152 & 154 | 1014.4506 | EPTSTPTTEA |
| 1257.5132 | 1.8 | 1.4 | [M-H] <sup>-</sup>     | 1 | 1 | 1 | 0 | 152/154   | 584.2806  | PTSTPT     |
| 1051.4346 | 1.8 | 2.0 | [M-H] <sup>-</sup>     | 1 | 1 | 0 | 0 | 152/154   | 669.2970  | GEPTSTP    |
| 1671.6459 | 1.8 | 5.6 | [M-2H+Na] <sup>-</sup> | 1 | 1 | 2 | 0 | 152/154   | 685.3283  | PTSTPTT    |
| 768.3171  | 1.8 | 2.0 | [M-H] <sup>-</sup>     | 1 | 1 | 0 | 0 | 152/154   | 386.1802  | PTST       |
| 768.3171  | 1.8 | 2.0 | [M-H] <sup>-</sup>     | 1 | 1 | 0 | 0 | 152/154   | 386.1802  | TSTP       |
| 768.3171  | 1.8 | 2.0 | [M-H] <sup>-</sup>     | 1 | 1 | 0 | 0 | 154       | 386.1802  | STPT       |
| 1540.5996 | 0.8 | 6.6 | [M-2H+Na] <sup>-</sup> | 1 | 1 | 1 | 1 | 152/154   | 827.3661  | ASGEPTSTP  |

Table S-4

| GP Mass (Da) | Relative Intensity (%) | Error (ppm) | Charge State           | Glycans |        |       | H <sub>2</sub> O loss | Glycosite | Peptide Mass | Peptide Sequence |
|--------------|------------------------|-------------|------------------------|---------|--------|-------|-----------------------|-----------|--------------|------------------|
|              |                        |             |                        | Gal     | GalNAc | NeuAc |                       |           |              |                  |
| 1176.4730    | 100.0                  | 3.1         | [M+Na] <sup>+</sup>    | 1       | 1      | 0     | 0                     | 152/154   | 770.3446     | GEPTSTPT         |
| 1541.6096    | 48.3                   | 0.5         | [M+Na] <sup>+</sup>    | 2       | 2      | 0     | 0                     | 152 & 154 | 770.3446     | GEPTSTPT         |
| 1467.5750    | 29.1                   | 2.0         | [M+Na] <sup>+</sup>    | 1       | 1      | 1     | 0                     | 152/154   | 770.3446     | GEPTSTPT         |
| 1445.5946    | 20.3                   | 3.1         | [M+H] <sup>+</sup>     | 1       | 1      | 1     | 0                     | 152/154   | 770.3446     | GEPTSTPT         |
| 1198.4592    | 15.5                   | 0.6         | [M+2Na-H] <sup>+</sup> | 1       | 1      | 0     | 0                     | 152/154   | 770.3446     | GEPTSTPT         |
| 1379.5602    | 11.6                   | 4.8         | [M+2Na-H] <sup>+</sup> | 1       | 1      | 1     | 1                     | 186       | 642.3337     | NTVQVT           |
| 1379.5602    | 11.6                   | 3.0         | [M+Na] <sup>+</sup>    | 1       | 2      | 0     | 0                     | 152 & 154 | 770.3446     | GEPTSTPT         |
| 1832.7174    | 10.5                   | 7.2         | [M+Na] <sup>+</sup>    | 2       | 2      | 1     | 0                     | 152 & 154 | 770.3446     | GEPTSTPT         |
| 1563.5979    | 10.1                   | 4.6         | [M+2Na-H] <sup>+</sup> | 2       | 2      | 0     | 0                     | 152 & 154 | 770.3446     | GEPTSTPT         |
| 1154.4974    | 8.4                    | 2.4         | [M+H] <sup>+</sup>     | 1       | 1      | 0     | 0                     | 152/154   | 770.3446     | GEPTSTPT         |
| 1489.5598    | 7.6                    | 3.9         | [M+2Na-H] <sup>+</sup> | 1       | 1      | 1     | 0                     | 152/154   | 770.3446     | GEPTSTPT         |
| 1511.5421    | 5.7                    | 4.0         | [M+2Na-H] <sup>+</sup> | 1       | 1      | 2     | 1                     | 152/154   | 483.2329     | PTSTP            |
| 582.2518     | 5.7                    | 2.2         | [M+H] <sup>+</sup>     | 1       | 1      | 0     | 0                     | 142       | 198.1004     | PT               |
| 582.2518     | 5.7                    | 2.2         | [M+H] <sup>+</sup>     | 1       | 1      | 0     | 0                     | 152       | 198.1004     | PT               |
| 582.2518     | 5.7                    | 2.2         | [M+H] <sup>+</sup>     | 1       | 1      | 0     | 0                     | 154       | 198.1004     | TP               |
| 1557.5857    | 5.5                    | 3.7         | [M+2Na-H] <sup>+</sup> | 0       | 1      | 1     | 0                     | 152/154   | 1000.4349    | GEPTSTPTE        |
| 1810.7372    | 5.0                    | 8.2         | [M+H] <sup>+</sup>     | 2       | 2      | 1     | 0                     | 152 & 154 | 770.3446     | GEPTSTPT         |
| 992.4423     | 4.8                    | 0.4         | [M+H] <sup>+</sup>     | 0       | 1      | 0     | 0                     | 152/154   | 770.3446     | GEPTSTPT         |
| 1423.5890    | 4.8                    | 4.8         | [M+Na] <sup>+</sup>    | 0       | 2      | 1     | 0                     | 152 & 154 | 685.3283     | PTSTPTT          |
| 1423.5890    | 4.8                    | 4.8         | [M+Na] <sup>+</sup>    | 1       | 2      | 0     | 0                     | 152 & 154 | 814.3709     | EPTSTPTT         |
| 1423.5890    | 4.8                    | 4.8         | [M+Na] <sup>+</sup>    | 1       | 2      | 0     | 0                     | 152 & 154 | 814.3709     | PTSTPTE          |
| 1736.6976    | 4.7                    | 7.0         | [M+H] <sup>+</sup>     | 1       | 1      | 2     | 0                     | 152/154   | 770.3446     | GEPTSTPT         |
| 1014.4234    | 4.3                    | 0.4         | [M+Na] <sup>+</sup>    | 0       | 1      | 0     | 0                     | 152/154   | 770.3446     | GEPTSTPT         |

|           |     |     |                        |   |   |   |   |           |          |            |
|-----------|-----|-----|------------------------|---|---|---|---|-----------|----------|------------|
| 990.4130  | 4.1 | 0.4 | [M+Na] <sup>+</sup>    | 1 | 1 | 0 | 0 | 152/154   | 584.2806 | PTSTPT     |
| 1258.4957 | 3.9 | 3.0 | [M+Na] <sup>+</sup>    | 2 | 2 | 0 | 0 | 152 & 154 | 487.2278 | TSTPT      |
| 1648.6829 | 3.0 | 8.1 | [M+H] <sup>+</sup>     | 1 | 2 | 1 | 0 | 152 & 154 | 770.3446 | GEPTSTPT   |
| 1854.7054 | 3.0 | 3.8 | [M+Na] <sup>+</sup>    | 2 | 2 | 2 | 1 | 152 & 154 | 483.2329 | PTSTP      |
| 1471.5514 | 2.5 | 2.9 | [M+Na] <sup>+</sup>    | 1 | 1 | 2 | 0 | 152/154   | 483.2329 | PTSTP      |
| 1283.5432 | 2.5 | 4.6 | [M+H] <sup>+</sup>     | 0 | 1 | 1 | 0 | 152/154   | 770.3446 | GEPTSTPT   |
| 1449.5704 | 2.4 | 2.3 | [M+H] <sup>+</sup>     | 1 | 1 | 2 | 0 | 152/154   | 483.2329 | PTSTP      |
| 1876.6876 | 2.2 | 3.8 | [M+2Na-H] <sup>+</sup> | 2 | 2 | 2 | 1 | 152 & 154 | 483.2329 | PTSTP      |
| 1519.6326 | 2.2 | 3.8 | [M+H] <sup>+</sup>     | 2 | 2 | 0 | 0 | 152 & 154 | 770.3446 | GEPTSTPT   |
| 1006.4094 | 2.1 | 1.9 | [M+Na] <sup>+</sup>    | 1 | 1 | 0 | 0 | 154       | 600.2755 | TPTTEA     |
| 1355.5522 | 1.8 | 5.5 | [M+Na] <sup>+</sup>    | 2 | 2 | 0 | 0 | 152 & 154 | 584.2806 | PTSTPT     |
| 2123.8323 | 1.8 | 9.6 | [M+H] <sup>+</sup>     | 2 | 2 | 3 | 1 | 152 & 154 | 483.2329 | PTSTP      |
| 1220.4442 | 1.8 | 7.0 | [M+2Na-H] <sup>+</sup> | 1 | 1 | 1 | 1 | 152/154   | 483.2329 | PTSTP      |
| 1202.4937 | 1.7 | 8.2 | [M+Na] <sup>+</sup>    | 0 | 1 | 0 | 0 | 152/154   | 958.4244 | SGEPTSTPTT |
| 1401.5450 | 1.7 | 5.1 | [M+2Na-H] <sup>+</sup> | 1 | 2 | 0 | 0 | 152 & 154 | 770.3446 | GEPTSTPT   |
| 1401.5450 | 1.7 | 3.7 | [M+Na] <sup>+</sup>    | 1 | 2 | 1 | 1 | 152 & 154 | 483.2329 | PTSTP      |
| 1401.5450 | 1.7 | 3.7 | [M+Na] <sup>+</sup>    | 2 | 2 | 0 | 1 | 152 & 154 | 612.2755 | EPTSTP     |
| 1357.5823 | 1.6 | 7.8 | [M+Na] <sup>+</sup>    | 1 | 1 | 1 | 1 | 186       | 642.3337 | NTVQVT     |
| 1357.5823 | 1.6 | 6.1 | [M+H] <sup>+</sup>     | 1 | 2 | 0 | 0 | 152 & 154 | 770.3446 | GEPTSTPT   |
| 1405.5775 | 1.5 | 3.8 | [M+Na] <sup>+</sup>    | 0 | 2 | 0 | 0 | 152 & 154 | 958.4244 | SGEPTSTPTT |
| 898.3399  | 1.5 | 1.3 | [M+Na] <sup>+</sup>    | 1 | 2 | 0 | 0 | 152 & 152 | 289.1274 | TST        |
| 898.3399  | 1.5 | 1.3 | [M+Na] <sup>+</sup>    | 1 | 2 | 0 | 0 | 186       | 289.1274 | TST        |
| 786.2977  | 1.5 | 1.9 | [M+2Na-H] <sup>+</sup> | 1 | 1 | 0 | 0 | 163       | 358.1852 | STVA       |
| 1158.4722 | 1.4 | 5.3 | [M+H] <sup>+</sup>     | 1 | 1 | 1 | 0 | 152/154   | 483.2329 | PTSTP      |
| 1045.4917 | 1.3 | 0.5 | [M+Na] <sup>+</sup>    | 1 | 1 | 0 | 0 | 142       | 639.3592 | IPTINT     |
| 1045.4917 | 1.3 | 0.5 | [M+Na] <sup>+</sup>    | 1 | 1 | 0 | 0 | 142       | 639.3592 | PTINTI     |

|           |     |     |                        |   |   |   |   |           |          |           |
|-----------|-----|-----|------------------------|---|---|---|---|-----------|----------|-----------|
| 792.3109  | 1.3 | 1.6 | [M+Na] <sup>+</sup>    | 1 | 1 | 0 | 0 | 152/154   | 386.1802 | PTST      |
| 792.3109  | 1.3 | 1.6 | [M+Na] <sup>+</sup>    | 1 | 1 | 0 | 0 | 154       | 386.1802 | STPT      |
| 792.3109  | 1.3 | 1.6 | [M+Na] <sup>+</sup>    | 1 | 1 | 0 | 0 | 152/154   | 386.1802 | TSTP      |
| 1075.4321 | 1.3 | 3.0 | [M+Na] <sup>+</sup>    | 1 | 1 | 0 | 0 | 152/154   | 669.2970 | GEPTSTP   |
| 1075.4321 | 1.3 | 8.5 | [M+H] <sup>+</sup>     | 1 | 1 | 1 | 0 | 154       | 400.1958 | TPTT      |
| 1744.6987 | 1.2 | 7.4 | [M+2Na-H] <sup>+</sup> | 1 | 1 | 2 | 1 | 186       | 716.3705 | TVQVTST   |
| 1585.5865 | 1.2 | 1.0 | [M+2Na-H] <sup>+</sup> | 2 | 2 | 1 | 1 | 152 & 152 | 483.2329 | PTSTP     |
| 1780.6626 | 1.2 | 7.4 | [M+2Na-H] <sup>+</sup> | 1 | 1 | 2 | 0 | 152/154   | 770.3446 | GEPTSTPT  |
| 1136.4214 | 1.2 | 9.1 | [M+2Na-H] <sup>+</sup> | 1 | 2 | 0 | 1 | 152 & 154 | 487.2278 | TSTPT     |
| 1836.6917 | 1.2 | 2.0 | [M+Na] <sup>+</sup>    | 2 | 2 | 2 | 0 | 152 & 154 | 483.2329 | PTSTP     |
| 1297.5052 | 1.1 | 1.8 | [M+Na] <sup>+</sup>    | 1 | 1 | 1 | 0 | 154       | 600.2755 | TPTTEA    |
| 1114.4803 | 1.1 | 5.9 | [M+2Na-H] <sup>+</sup> | 0 | 1 | 0 | 1 | 163       | 830.4022 | ESTVATLE  |
| 1114.4803 | 1.1 | 4.2 | [M+2Na-H] <sup>+</sup> | 0 | 1 | 0 | 1 | 186       | 830.4134 | NTVQVTST  |
| 1114.4803 | 1.1 | 5.8 | [M+2Na-H] <sup>+</sup> | 1 | 1 | 0 | 0 | 186       | 686.3599 | QVTSTAV   |
| 1114.4803 | 1.1 | 5.8 | [M+2Na-H] <sup>+</sup> | 1 | 1 | 0 | 0 | 186       | 686.3599 | VQVTSTA   |
| 880.3273  | 1.0 | 1.0 | [M+Na] <sup>+</sup>    | 0 | 1 | 1 | 1 | 152/154   | 327.1430 | EPT       |
| 769.3586  | 1.0 | 2.6 | [M+2Na-H] <sup>+</sup> | 0 | 1 | 0 | 1 | 163       | 485.2849 | TVATL     |
| 727.2634  | 1.0 | 1.8 | [M+2Na-H] <sup>+</sup> | 1 | 1 | 0 | 0 | 154       | 299.1481 | TPT       |
| 1670.6725 | 1.0 | 5.3 | [M+H] <sup>+</sup>     | 1 | 2 | 2 | 1 | 152 & 154 | 483.2329 | PTSTP     |
| 1670.6725 | 1.0 | 5.3 | [M+H] <sup>+</sup>     | 2 | 2 | 1 | 1 | 152 & 154 | 612.2755 | EPTSTP    |
| 947.4065  | 0.9 | 0.3 | [M+Na] <sup>+</sup>    | 1 | 1 | 0 | 0 | 142       | 541.2748 | TEIPT     |
| 1119.4574 | 0.9 | 8.0 | [M+Na] <sup>+</sup>    | 0 | 1 | 0 | 1 | 152/154   | 857.3767 | SGEPTSTPT |
| 1119.4574 | 0.9 | 2.0 | [M+Na] <sup>+</sup>    | 0 | 1 | 1 | 0 | 152/154   | 584.2806 | PTSTPT    |
| 1119.4574 | 0.9 | 2.0 | [M+Na] <sup>+</sup>    | 1 | 1 | 0 | 0 | 152/154   | 713.3232 | EPTSTPT   |
| 1395.5325 | 0.9 | 3.4 | [M+2Na-H] <sup>+</sup> | 2 | 2 | 0 | 1 | 152 & 154 | 584.2806 | PTSTPT    |
| 1093.4398 | 0.9 | 0.3 | [M+Na] <sup>+</sup>    | 1 | 1 | 0 | 1 | 152/154   | 669.2970 | GEPTSTP   |
| 1384.5392 | 0.9 | 3.1 | [M+Na] <sup>+</sup>    | 1 | 1 | 1 | 1 | 152/154   | 669.2970 | GEPTSTP   |

|           |     |     |                        |   |   |   |   |           |           |            |
|-----------|-----|-----|------------------------|---|---|---|---|-----------|-----------|------------|
| 1384.5392 | 0.9 | 3.1 | [M+Na] <sup>+</sup>    | 1 | 1 | 1 | 0 | 152/154   | 687.3075  | STPTTEA    |
| 1384.5392 | 0.9 | 5.8 | [M+H] <sup>+</sup>     | 1 | 1 | 2 | 1 | 154       | 400.1958  | TPTT       |
| 1770.7118 | 0.9 | 8.8 | [M+H] <sup>+</sup>     | 1 | 1 | 2 | 1 | 163       | 786.3759  | EAVESTVA   |
| 1770.7118 | 0.9 | 1.9 | [M+Na] <sup>+</sup>    | 0 | 2 | 1 | 1 | 152 & 154 | 1014.4506 | EPTSTPTTEA |
| 1305.4961 | 0.9 | 7.3 | [M+2Na-H] <sup>+</sup> | 1 | 1 | 1 | 0 | 163       | 586.2962  | AVESTV     |
| 1305.4961 | 0.9 | 7.3 | [M+2Na-H] <sup>+</sup> | 1 | 1 | 1 | 0 | 163       | 586.2962  | VESTVA     |
| 1458.5797 | 0.8 | 5.5 | [M+Na] <sup>+</sup>    | 2 | 2 | 0 | 1 | 152 & 154 | 669.2970  | GEPTSTP    |
| 1275.5291 | 0.8 | 6.4 | [M+H] <sup>+</sup>     | 1 | 1 | 1 | 0 | 154       | 600.2755  | TPTTEA     |
| 814.2950  | 0.8 | 1.2 | [M+2Na-H] <sup>+</sup> | 1 | 1 | 0 | 0 | 152/154   | 386.1802  | TSTP       |
| 814.2950  | 0.8 | 1.2 | [M+2Na-H] <sup>+</sup> | 1 | 1 | 0 | 0 | 152/154   | 386.1802  | PTST       |
| 814.2950  | 0.8 | 1.2 | [M+2Na-H] <sup>+</sup> | 1 | 1 | 0 | 0 | 154       | 386.1802  | STPT       |
| 1156.4436 | 0.8 | 3.8 | [M+2Na-H] <sup>+</sup> | 0 | 2 | 0 | 1 | 152 & 154 | 669.2970  | GEPTSTP    |
| 1280.4789 | 0.8 | 3.9 | [M+2Na-H] <sup>+</sup> | 2 | 2 | 0 | 0 | 152 & 154 | 487.2278  | TSTPT      |
| 1493.5267 | 0.7 | 7.3 | [M+2Na-H] <sup>+</sup> | 1 | 1 | 2 | 0 | 152/154   | 483.2329  | PTSTP      |
| 1677.6372 | 0.7 | 2.1 | [M+2Na-H] <sup>+</sup> | 1 | 1 | 1 | 0 | 152/154   | 958.4244  | SGEPTSTPTT |
| 1083.4088 | 0.7 | 1.2 | [M+Na] <sup>+</sup>    | 1 | 1 | 1 | 0 | 152/154   | 386.1802  | PTST       |
| 1083.4088 | 0.7 | 1.2 | [M+Na] <sup>+</sup>    | 1 | 1 | 1 | 0 | 152/154   | 386.1802  | TSTP       |
| 1083.4088 | 0.7 | 1.2 | [M+Na] <sup>+</sup>    | 1 | 1 | 1 | 0 | 154       | 386.1802  | STPT       |
| 1193.4933 | 0.7 | 1.1 | [M+Na] <sup>+</sup>    | 1 | 2 | 0 | 0 | 152 & 154 | 584.2806  | PTSTPT     |
| 1626.6748 | 0.7 | 6.3 | [M+H] <sup>+</sup>     | 1 | 1 | 2 | 1 | 186       | 642.3337  | NTVQVT     |
| 2025.8635 | 0.7 | 1.9 | [M+2Na-H] <sup>+</sup> | 1 | 1 | 2 | 1 | 142       | 997.5444  | KTEIPTINT  |
| 962.3828  | 0.7 | 4.1 | [M+2Na-H] <sup>+</sup> | 1 | 1 | 0 | 1 | 186       | 516.2544  | QVTST      |
| 962.3828  | 0.7 | 1.6 | [M+Na] <sup>+</sup>    | 0 | 2 | 0 | 0 | 152 & 154 | 515.2227  | EPTST      |
| 1221.4479 | 0.3 | 0.1 | [M+2Na-H] <sup>+</sup> | 1 | 2 | 0 | 1 | 152 & 154 | 572.2442  | GEPTST     |
| 1115.4861 | 0.3 | 2.1 | [M+H] <sup>+</sup>     | 0 | 1 | 1 | 1 | 152/154   | 584.2806  | PTSTPT     |
| 1115.4861 | 0.3 | 7.3 | [M+2Na-H] <sup>+</sup> | 1 | 1 | 0 | 1 | 142       | 669.3697  | KTEIPT     |
| 1115.4861 | 0.3 | 2.1 | [M+H] <sup>+</sup>     | 1 | 1 | 0 | 1 | 152/154   | 713.3232  | EPTSTPT    |

|           |     |     |               |   |   |   |   |         |          |         |
|-----------|-----|-----|---------------|---|---|---|---|---------|----------|---------|
| 1402.5461 | 0.3 | 0.5 | $[M+Na]^+$    | 1 | 1 | 1 | 1 | 154     | 687.3075 | STPTTEA |
| 1105.3940 | 0.2 | 4.1 | $[M+2Na-H]^+$ | 1 | 1 | 1 | 0 | 152/154 | 386.1802 | TSTP    |
| 1105.3940 | 0.2 | 4.1 | $[M+2Na-H]^+$ | 1 | 1 | 1 | 0 | 152/154 | 386.1802 | PTST    |
| 1105.3940 | 0.2 | 4.1 | $[M+2Na-H]^+$ | 1 | 1 | 1 | 0 | 154     | 386.1802 | STPT    |
| 1671.6729 | 0.2 | 8.3 | $[M+H]^+$     | 1 | 1 | 2 | 1 | 154     | 687.3075 | STPTTEA |
